# Supplementary material for: In situ synthesis of small Pt nanoparticles on chitin aerogel derived N doped ultra-thin carbon nanofibers for superior hydrogen evolution catalysis
Source: Royal Society of Chemistry journal article supplement (doi:10.1039/c9nj03675j), 2019-01-01
Supplement: c9nj03675j1.pdf [file c9nj03675j1.pdf]

## Supporting information

### ***In situ* synthesis of small Pt nanoparticles on chitin aerogel derived N doped ultra-thin carbon nanofibers for superior hydrogen evolution catalysis**

Wenjie Liu, Han Zhu\*, Liangri Ying, Zhenfeng Zhu, Huining Li, Shuanglong Lu, Fang Duan, Mingliang Du\*

Key Laboratory of Synthetic and Biological Colloids, Ministry of Education, School of Chemical and Material Engineering, Jiangnan University, Wuxi 214122, P. R. China.

E-mail: zhysw@jiangnan.edu.cn; [du@jiangnan.edu.cn](mailto:du@jiangnan.edu.cn)

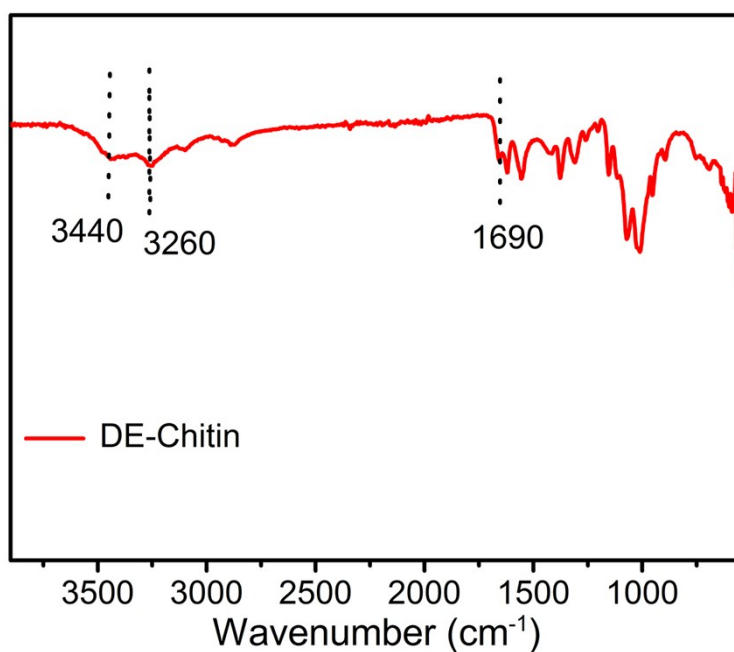

**Figure S1.** FT-IR spectra of the DE-chitin.

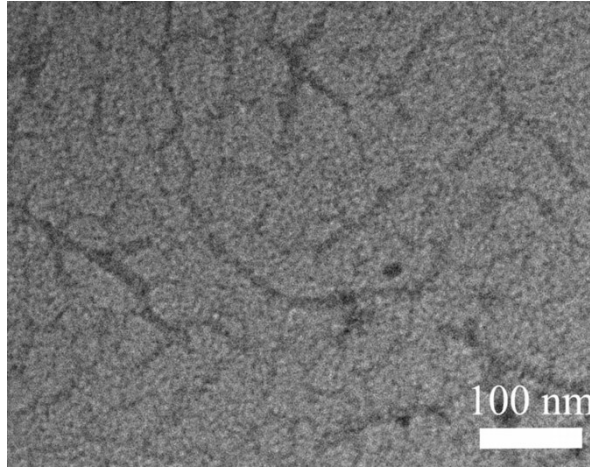

**Figure S2.** TEM image of chitin nanofibers.

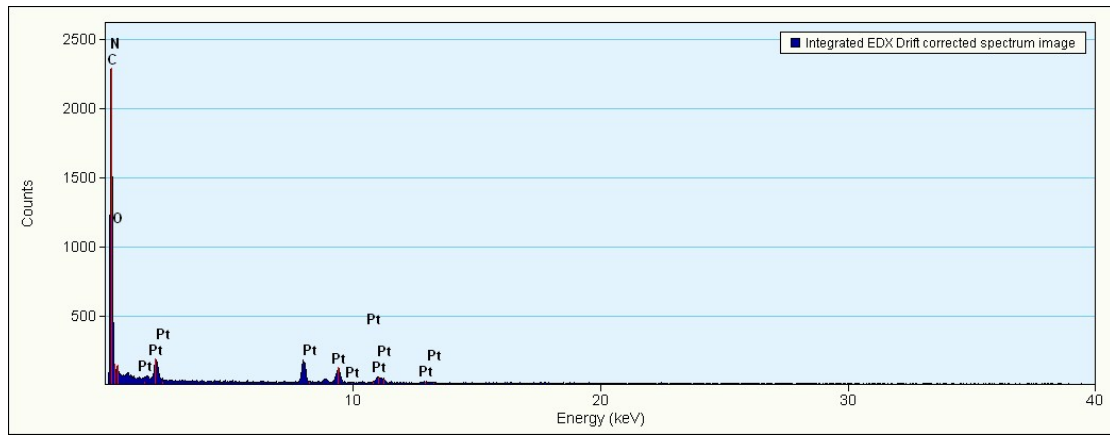

**Figure S3.** The EDX spectra of the NCN-Pt.

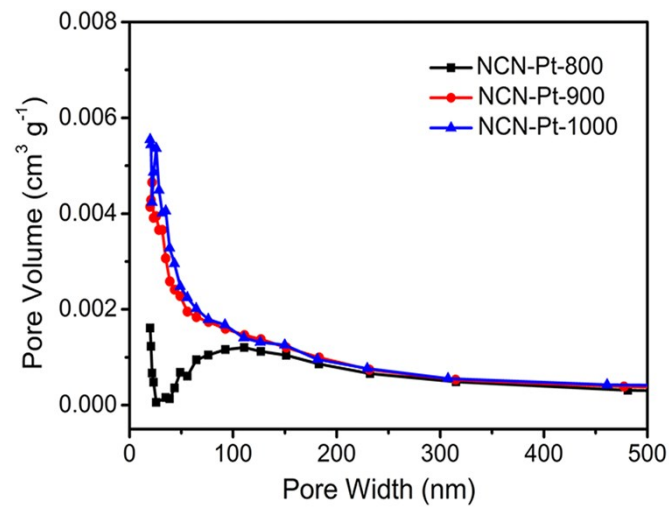

**Figure S4.** The corresponding BET adsorption pore size distribution of the NCN-Pt prepared at different temperatures.

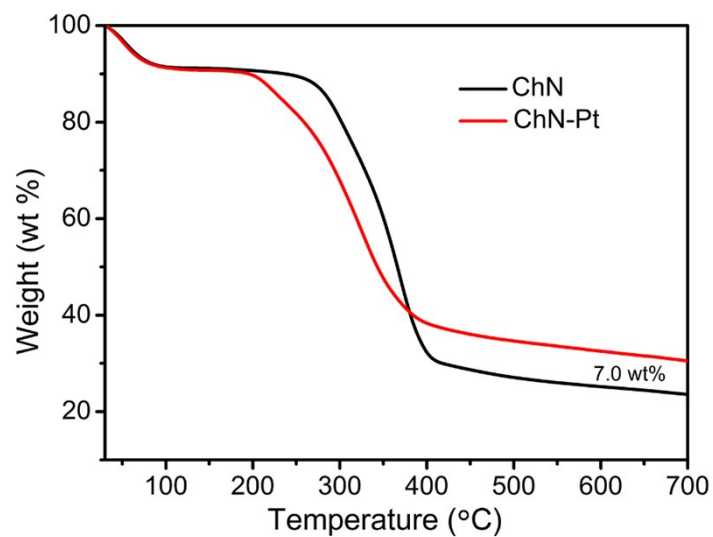

**Figure S5.** TGA curves of ChN and ChN-Pt.

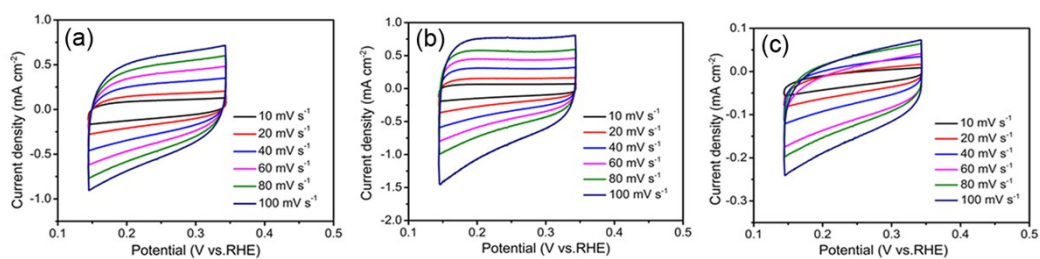

**Figure S6.** CV curves for NCN-Pt-800, NCN-Pt-900 and NCN-Pt-1000 with different rates from 10 to 100  $\text{mV s}^{-1}$  in the potential range of 0.144 to 0.344 V

**Table S1. HER performance of Pt-based catalysts.**

| Sample                                | Electrolytes                  | Pt loading ( $\mu\text{g cm}^{-2}$ ) | Overpotential (mV @ 10 mA $\text{cm}^{-2}$ ) | Tafel slope (mV $\text{dec}^{-1}$ ) | Reference |
|---------------------------------------|-------------------------------|--------------------------------------|----------------------------------------------|-------------------------------------|-----------|
| NCN-Pt-900                            | 0.5 M $\text{H}_2\text{SO}_4$ | 8.3                                  | 34                                           | 39                                  | This work |
| 10Pt@HN-BC                            | 0.5 M $\text{H}_2\text{SO}_4$ | 12                                   | 47                                           | 35                                  | 1         |
| Pt @N-doped hollow porous carbon      | 0.1 M $\text{HClO}_4$         | 2                                    | 57                                           | 27                                  | 2         |
| SWNT                                  | 0.5 M $\text{H}_2\text{SO}_4$ | 19.4                                 | 27                                           | 38                                  | 3         |
| WC @ C @ Pt                           | 0.5 M $\text{H}_2\text{SO}_4$ | 70.7                                 | 30                                           | 26                                  | 4         |
|                                       | 1 M KOH                       |                                      | 34                                           | 27                                  |           |
| YS-Pt-CoP                             | 1 M KOH                       | 11                                   | 48                                           | 54                                  | 5         |
| Pt <sub>1</sub> /NPC                  | 0.5 M $\text{H}_2\text{SO}_4$ | 3.8                                  | 25                                           | 28                                  | 6         |
| MoS <sub>2</sub> @Pt-3                | 0.5 M $\text{H}_2\text{SO}_4$ | 17                                   | 70                                           | 36                                  | 7         |
| Pt/BCF                                | 0.5 M $\text{H}_2\text{SO}_4$ | 7                                    | 135                                          | 70                                  | 8         |
| Pt <sub>66</sub> Ni <sub>34</sub> NFs | 0.5 M $\text{H}_2\text{SO}_4$ | 146                                  | 43                                           | 33                                  | 9         |
| Pt <sub>2.6</sub> Co <sub>1</sub> NFs | 0.5 M KOH                     | 152                                  | 40                                           | 42                                  | 10        |

1. Y. Zhang, J. Tan, F. Wen, Z. Zhou, M. Zhu, S. Yin and H. Wang, *Int. J. Hydrogen Energy*, 2018, **43**, 6167-6176.
2. J. Ying, G. Jiang, Z. Paul Cano, L. Han, X.-Y. Yang and Z. Chen, *Nano Energy*, 2017, **40**, 88-94.
3. M. Tavakkoli, N. Holmberg, R. Kronberg, H. Jiang, J. Sainio, E. I. Kauppinen, T. Kallio and K. Laasonen, *ACS Cat.*, 2017, **7**, 3121-3130.
4. Z. Liu, X. Huo, K. Xi, P. Li, L. Yue, M. Huang, G. Suo, L. Xu, W. Wang and X. Qu, *Energy Storage Mater.*, 2018, **10**, 268-274.
5. Z. Jiang, J. Ren, Y. Li, X. Zhang, P. Zhang, J. Huang, C. Du and J. Chen, *Dalton Trans.*, 2019, **48**, 8920-

8930.

6. T. Li, J. Liu, Y. Song and F. Wang, *ACS Catal.*, 2018, **8**, 8450-8458.
7. X. Y. Xu, X. F. Dong, Z. J. Bao, R. Wang, J. G. Hu and H. B. Zeng, *J. Mater. Chem. A*, 2017, **5**, 22654-22661.
8. Y. Mi, L. Wen, Z. Wang, D. Cao, H. Zhao, Y. Zhou, F. Grote and Y. Lei, *Catal. Today*, 2016, **262**, 141-145.
9. X.-Y. Huang, X.-Y. Zhu, X.-F. Zhang, L. Zhang, J.-J. Feng and A.-J. Wang, *Electrochim. Acta*, 2018, **271**, 397-405.
10. L.-Y. Jiang, X.-X. Lin, A.-J. Wang, J. Yuan, J.-J. Feng and X.-S. Li, *Electrochim. Acta*, 2017, **225**, 525-532.
